# Supplementary material for: Thirty-day hospital readmission prediction model based on common data model with weather and air quality data
Source: Sci Rep. 2021 Dec 2;11:23313. doi: 10.1038/s41598-021-02395-9 (PMC8639801; doi:10.1038/s41598-021-02395-9)
Supplement: Supplementary file 2 — Supplementary Information 2. [file 41598_2021_2395_MOESM2_ESM.xlsx]

## Sheet: Supplementary Table S3
Supplementary Table S3. Top 20 predictors selected from gradient boosting machine model with clinical covariates and W-score. (Mental and behavioral disorders)
No.	Internal (Train/Test by SNUH)				External (Valid by SNUBH)
	covariateName	covariateValue	CovariateMeanWithNoOutcome	CovariateMeanWithOutcome	covariateName	covariateValue	CovariateMeanWithNoOutcome	CovariateMeanWithOutcome
1	visit_occurrence concept count during day -365 through -1 concept_count relative to index: Emergency Room Visit	0.0261819	1.39478	5.82245	visit_occurrence concept count during day -365 through -1 concept_count relative to index: Emergency Room Visit	0.0261819	2.16035	35.7441
2	visit_occurrence concept count during day -180 through -1 concept_count relative to index: Emergency Room Visit	0.0209239	0.913674	3.8201	visit_occurrence concept count during day -180 through -1 concept_count relative to index: Emergency Room Visit	0.0209239	1.27709	15.5016
3	visit_occurrence concept count during day -30 through -1 concept_count relative to index: Emergency Room Visit	0.0137063	0.385166	1.12494	visit_occurrence concept count during day -30 through -1 concept_count relative to index: Emergency Room Visit	0.0137063	0.492788	3.5
4	visit_occurrence concept count during day -365 through -1 concept_count relative to index: Outpatient Visit	0.00922343	35.9007	63.6891	visit_occurrence concept count during day -365 through -1 concept_count relative to index: Outpatient Visit	0.00922343	13.3303	19.7583
5	visit_occurrence concept count during day -180 through -1 concept_count relative to index: Outpatient Visit	0.00881644	18.9412	33.7961	visit_occurrence concept count during day -180 through -1 concept_count relative to index: Outpatient Visit	0.00881644	7.31768	10.3199
6	visit_occurrence concept count during day -30 through -1 concept_count relative to index: Outpatient Visit	0.00813775	3.86589	6.62987	visit_occurrence concept count during day -30 through -1 concept_count relative to index: Outpatient Visit	0.00813775	1.53925	2.03002
7	drug_exposure during day -180 through -1 days relative to index: Citrulline Oral Solution	0.00607204	0.00527754	0.0535463	drug_era distinct concept count during day -365 through -1 concept_count relative to index	0.00581833	22.9099	32.045
8	drug_era distinct concept count during day -365 through -1 concept_count relative to index	0.00581833	24.7662	32.8506	visit_occurrence concept count during day -30 through -1 concept_count relative to index: Inpatient Visit	0.00568853	0.496142	0.35545
9	visit_occurrence concept count during day -30 through -1 concept_count relative to index: Inpatient Visit	0.00568853	0.613985	0.44481	drug_era distinct concept count during day -180 through -1 concept_count relative to index	0.00558364	18.5582	24.4092
10	drug_era distinct concept count during day -180 through -1 concept_count relative to index	0.00558364	19.5124	26.1367	drug_era distinct concept count during day -30 through -1 concept_count relative to index	0.00494667	13.0233	14.8902
11	drug_exposure during day -30 through -1 days relative to index: Citrulline Oral Solution	0.00553661	0.00188484	0.0488492	drug_exposure during day -180 through -1 days relative to index: 50 ML sodium chloride 9 MG/ML Injection	0.0049059	0.425864	0.665877
12	drug_era distinct concept count during day -30 through -1 concept_count relative to index	0.00494667	12.5438	15.4814	visit_occurrence concept count during day -180 through -1 concept_count relative to index: Inpatient Visit	0.00473511	0.864978	1.08452
13	drug_exposure during day -180 through -1 days relative to index: 50 ML sodium chloride 9 MG/ML Injection	0.0049059	0.411366	0.623767	condition_era distinct concept count during day -180 through -1 concept_count relative to index	0.00471598	6.81047	10.0427
14	visit_occurrence concept count during day -180 through -1 concept_count relative to index: Inpatient Visit	0.00473511	1.30044	1.10944	visit_occurrence concept count during day -365 through -1 concept_count relative to index: Inpatient Visit	0.0046448	1.18215	1.69589
15	condition_era distinct concept count during day -180 through -1 concept_count relative to index	0.00471598	8.25549	10.4519	condition_era distinct concept count during day -365 through -1 concept_count relative to index	0.00449948	9.01208	14.4518
16	visit_occurrence concept count during day -365 through -1 concept_count relative to index: Inpatient Visit	0.0046448	1.88964	1.69986	condition_era distinct concept count during day -30 through -1 concept_count relative to index	0.00413489	3.31986	4.37125
17	condition_era distinct concept count during day -365 through -1 concept_count relative to index	0.00449948	9.97097	12.6501	drug_exposure during day -180 through -1 days relative to index: morphine sulfate 5 MG/ML Injection	0.00385265	0.065582	0.193523
18	drug_exposure during day -365 through -1 days relative to index: Metoclopramide 10 MG Injectable Solution	0.00430213	0.171143	0.345702	drug_exposure during day -365 through -1 days relative to index: 50 ML sodium chloride 9 MG/ML Injection	0.00378275	0.505367	0.750395
19	drug_exposure during day -365 through -1 days relative to index: Citrulline Oral Solution	0.00426198	0.00970691	0.0671677	drug_exposure during day -365 through -1 days relative to index: morphine sulfate 5 MG/ML Injection	0.00324043	0.0929218	0.254344
20	condition_era distinct concept count during day -30 through -1 concept_count relative to index	0.00413489	4.61719	5.69516	drug_exposure any time prior through -1 days relative to index: morphine sulfate 5 MG/ML Injection	0.00253795	0.279772	0.495261

## Sheet: Supplementary Table S4
Supplementary Table S4. Top 20 predictors selected from gradient boosting machine model with clinical covariates and W-score. (Diseases of the circulatory system )
No.	Internal (Train/Test by SNUH)				External (Valid by SNUBH)
	covariateName	covariateValue	CovariateMeanWithNoOutcome	CovariateMeanWithOutcome	covariateName	covariateValue	CovariateMeanWithNoOutcome	CovariateMeanWithOutcome
1	visit_occurrence concept count during day -180 through -1 concept_count relative to index: Emergency Room Visit	0.0208903	0.840362	2.35344	visit_occurrence concept count during day -180 through -1 concept_count relative to index: Emergency Room Visit	0.0208903	1.00147	2.25234
2	visit_occurrence concept count during day -365 through -1 concept_count relative to index: Emergency Room Visit	0.0204873	1.23288	3.41336	visit_occurrence concept count during day -365 through -1 concept_count relative to index: Emergency Room Visit	0.0204873	1.48648	3.54815
3	visit_occurrence concept count during day -30 through -1 concept_count relative to index: Emergency Room Visit	0.0102052	0.372333	0.82309	visit_occurrence concept count during day -30 through -1 concept_count relative to index: Emergency Room Visit	0.0102052	0.440499	0.834931
4	visit_occurrence concept count during day -180 through -1 concept_count relative to index: Outpatient Visit	0.00955229	18.4231	29.853	visit_occurrence concept count during day -180 through -1 concept_count relative to index: Outpatient Visit	0.00955229	7.57589	9.01204
5	visit_occurrence concept count during day -365 through -1 concept_count relative to index: Outpatient Visit	0.00877312	33.2168	51.5332	visit_occurrence concept count during day -365 through -1 concept_count relative to index: Outpatient Visit	0.00877312	13.5705	15.97
6	visit_occurrence concept count during day -30 through -1 concept_count relative to index: Outpatient Visit	0.00847084	3.94928	6.33965	visit_occurrence concept count during day -30 through -1 concept_count relative to index: Outpatient Visit	0.00847084	1.62759	1.87405
7	drug_era distinct concept count during day -365 through -1 concept_count relative to index	0.00792271	26.1834	36.2566	drug_era distinct concept count during day -365 through -1 concept_count relative to index	0.00792271	30.5145	33.5568
8	drug_era distinct concept count during day -180 through -1 concept_count relative to index	0.00778643	20.9332	28.6625	drug_era distinct concept count during day -180 through -1 concept_count relative to index	0.00778643	25.3913	28.3918
9	condition_era distinct concept count during day -365 through -1 concept_count relative to index	0.00620772	9.42576	12.228	condition_era distinct concept count during day -365 through -1 concept_count relative to index	0.00620772	10.111	12.3274
10	condition_era distinct concept count during day -180 through -1 concept_count relative to index	0.00602735	7.87504	10.0454	condition_era distinct concept count during day -180 through -1 concept_count relative to index	0.00602735	7.98798	9.72637
11	drug_exposure during day -365 through -1 days relative to index: 50 ML sodium chloride 9 MG/ML Injection	0.0051944	0.529639	0.721233	drug_exposure during day -365 through -1 days relative to index: 50 ML sodium chloride 9 MG/ML Injection	0.0051944	0.596035	0.696723
12	drug_era distinct concept count during day -30 through -1 concept_count relative to index	0.00511768	13.5399	16.4693	drug_era distinct concept count during day -30 through -1 concept_count relative to index	0.00511768	18.503	20.0558
13	drug_exposure during day -365 through -1 days relative to index: acetaminophen 1000 MG Oral Tablet	0.00503015	0.230267	0.404365	condition_occurrence during day -180 through -1 days relative to index: Fever	0.00375456	0.0935447	0.176215
14	drug_exposure during day -180 through -1 days relative to index: acetaminophen 1000 MG Oral Tablet	0.00381239	0.183865	0.339077	condition_era distinct concept count during day -30 through -1 concept_count relative to index	0.00374315	4.05728	4.63286
15	condition_occurrence during day -180 through -1 days relative to index: Fever	0.00375456	0.0594016	0.154317	drug_exposure during day -180 through -1 days relative to index: 50 ML sodium chloride 9 MG/ML Injection	0.00309402	0.513683	0.606888
16	condition_era distinct concept count during day -30 through -1 concept_count relative to index	0.00374315	4.31079	5.28681	visit_occurrence concept count during day -30 through -1 concept_count relative to index: Inpatient Visit	0.00282963	0.709954	0.55428
17	drug_exposure during day -180 through -1 days relative to index: 50 ML sodium chloride 9 MG/ML Injection	0.00309402	0.457361	0.651924	visit_occurrence concept count during day -365 through -1 concept_count relative to index: Inpatient Visit	0.00273845	1.71723	1.71077
18	visit_occurrence concept count during day -30 through -1 concept_count relative to index: Inpatient Visit	0.00282963	0.645425	0.668581	visit_occurrence concept count during day -180 through -1 concept_count relative to index: Inpatient Visit	0.00266449	1.25922	1.24599
19	visit_occurrence concept count during day -365 through -1 concept_count relative to index: Inpatient Visit	0.00273845	1.88185	2.57074	drug_exposure any time prior through -1 days relative to index: 50 ML sodium chloride 9 MG/ML Injection	0.00249029	0.839789	0.86391
20	visit_occurrence concept count during day -180 through -1 concept_count relative to index: Inpatient Visit	0.00266449	1.31386	1.73387	drug_exposure during day -30 through -1 days relative to index: 50 ML sodium chloride 9 MG/ML Injection	0.00224034	0.379685	0.39757

## Sheet: Supplementary Table S5
Supplementary Table S5. Top 20 predictors selected from gradient boosting machine model with clinical covariates and W-score. (Diseases of the musculoskeletal system and connective tissue)
No.	Internal (Train/Test by SNUH)				External (Valid by SNUBH)
	covariateName	covariateValue	CovariateMeanWithNoOutcome	CovariateMeanWithOutcome	covariateName	covariateValue	CovariateMeanWithNoOutcome	CovariateMeanWithOutcome
1	visit_occurrence concept count during day -365 through -1 concept_count relative to index: Emergency Room Visit	0.029366	0.950972	3.71346	visit_occurrence concept count during day -365 through -1 concept_count relative to index: Emergency Room Visit	0.029366	5.20764	87.3359
2	visit_occurrence concept count during day -180 through -1 concept_count relative to index: Emergency Room Visit	0.0237794	0.645618	2.5695	visit_occurrence concept count during day -180 through -1 concept_count relative to index: Emergency Room Visit	0.0237794	1.98163	27.5733
3	visit_occurrence concept count during day -180 through -1 concept_count relative to index: Outpatient Visit	0.0144352	17.2573	30.693	visit_occurrence concept count during day -180 through -1 concept_count relative to index: Outpatient Visit	0.0144352	10.1333	19.0303
4	visit_occurrence concept count during day -30 through -1 concept_count relative to index: Emergency Room Visit	0.0130313	0.292858	0.852617	visit_occurrence concept count during day -30 through -1 concept_count relative to index: Emergency Room Visit	0.0130313	0.373359	4.51259
5	visit_occurrence concept count during day -365 through -1 concept_count relative to index: Outpatient Visit	0.011634	31.0297	54.1817	visit_occurrence concept count during day -365 through -1 concept_count relative to index: Outpatient Visit	0.011634	20.5497	37.9659
6	visit_occurrence concept count during day -30 through -1 concept_count relative to index: Outpatient Visit	0.00799626	3.87406	6.50986	visit_occurrence concept count during day -30 through -1 concept_count relative to index: Outpatient Visit	0.00799626	1.84913	3.15143
7	drug_era distinct concept count during day -365 through -1 concept_count relative to index	0.00666262	23.2609	32.6344	drug_era distinct concept count during day -365 through -1 concept_count relative to index	0.00666262	29.1036	40.61
8	drug_era distinct concept count during day -180 through -1 concept_count relative to index	0.00635616	18.8759	25.9894	drug_era distinct concept count during day -180 through -1 concept_count relative to index	0.00635616	22.7024	25.2838
9	condition_era distinct concept count during day -365 through -1 concept_count relative to index	0.00586369	8.45841	11.2549	condition_era distinct concept count during day -365 through -1 concept_count relative to index	0.00586369	9.99933	20.2719
10	condition_era distinct concept count during day -180 through -1 concept_count relative to index	0.00568544	6.958	9.20982	condition_era distinct concept count during day -180 through -1 concept_count relative to index	0.00568544	7.09393	13.3732
11	visit_occurrence concept count during day -30 through -1 concept_count relative to index: Inpatient Visit	0.0042287	0.611664	0.567635	visit_occurrence concept count during day -30 through -1 concept_count relative to index: Inpatient Visit	0.0042287	1.37149	0.170739
12	drug_era distinct concept count during day -30 through -1 concept_count relative to index	0.00415551	12.8413	15.077	drug_era distinct concept count during day -30 through -1 concept_count relative to index	0.00415551	15.613	15.8432
13	visit_occurrence concept count during day -365 through -1 concept_count relative to index: Inpatient Visit	0.00396018	1.4935	2.05964	visit_occurrence concept count during day -365 through -1 concept_count relative to index: Inpatient Visit	0.00396018	12.5856	1.54039
14	condition_era distinct concept count during day -30 through -1 concept_count relative to index	0.00344457	3.76503	4.80665	condition_era distinct concept count during day -30 through -1 concept_count relative to index	0.00344457	3.39749	6.68091
15	visit_occurrence concept count during day -180 through -1 concept_count relative to index: Inpatient Visit	0.00338941	1.09614	1.41249	visit_occurrence concept count during day -180 through -1 concept_count relative to index: Inpatient Visit	0.00338941	6.70911	0.733909
16	drug_exposure any time prior through -1 days relative to index: acetaminophen 1000 MG Oral Tablet	0.00307769	0.29423	0.473365	drug_exposure during day -180 through -1 days relative to index: 50 ML sodium chloride 9 MG/ML Injection	0.00278233	0.520031	0.762332
17	drug_exposure during day -180 through -1 days relative to index: fentanyl 0.2 MG Oral Lozenge	0.00295875	0.00247427	0.029663	drug_exposure during day -365 through -1 days relative to index: morphine sulfate 5 MG/ML Injection	0.00260923	0.331803	0.848513
18	drug_exposure during day -180 through -1 days relative to index: 50 ML sodium chloride 9 MG/ML Injection	0.00278233	0.461004	0.643112	drug_exposure any time prior through -1 days relative to index: morphine sulfate 5 MG/ML Injection	0.00216125	0.655917	0.948792
19	drug_exposure any time prior through -1 days relative to index: fentanyl 0.2 MG Oral Lozenge	0.00269932	0.0061129	0.0447274	drug_exposure during day -180 through -1 days relative to index: morphine sulfate 5 MG/ML Injection	0.00214297	0.206378	0.752221
20	drug_exposure during day -180 through -1 days relative to index: acetaminophen 1000 MG Oral Tablet	0.00262769	0.152386	0.287933	drug_exposure during day -365 through -1 days relative to index: famotidine 20 MG Oral Tablet	0.00214294	0.248978	0.544515

## Sheet: Supplementary Table S6
Supplementary Table S6. Top 20 predictors selected from gradient boosting machine model with clinical covariates and W-score. (Diseases of the respiratory system)
No.	Internal (Train/Test by SNUH)				External (Valid by SNUBH)
	covariateName	covariateValue	CovariateMeanWithNoOutcome	CovariateMeanWithOutcome	covariateName	covariateValue	CovariateMeanWithNoOutcome	CovariateMeanWithOutcome
1	visit_occurrence concept count during day -365 through -1 concept_count relative to index: Emergency Room Visit	0.199648	1.19818	3.09001	visit_occurrence concept count during day -365 through -1 concept_count relative to index: Emergency Room Visit	0.199648	2.50182	26.8633
2	visit_occurrence concept count during day -180 through -1 concept_count relative to index: Emergency Room Visit	0.12693	0.788886	2.02857	visit_occurrence concept count during day -180 through -1 concept_count relative to index: Emergency Room Visit	0.12693	1.48749	12.6548
3	visit_occurrence concept count during day -30 through -1 concept_count relative to index: Inpatient Visit	0.0318152	0.544775	0.578609	visit_occurrence concept count during day -30 through -1 concept_count relative to index: Inpatient Visit	0.0318152	0.638139	0.483944
4	drug_era during day -1 through -1 days relative to index: sodium chloride	0.0238179	0.330638	0.475864	drug_era during day -1 through -1 days relative to index: sodium chloride	0.0238179	0.448035	0.507086
5	visit_occurrence concept count during day -180 through -1 concept_count relative to index: Outpatient Visit	0.0201866	17.3891	28.2189	visit_occurrence concept count during day -180 through -1 concept_count relative to index: Outpatient Visit	0.0201866	8.81435	9.33951
6	visit_occurrence concept count during day -30 through -1 concept_count relative to index: Outpatient Visit	0.0167636	3.8614	5.95516	visit_occurrence concept count during day -30 through -1 concept_count relative to index: Outpatient Visit	0.0167636	1.70079	1.74619
7	drug_era distinct concept count during day -180 through -1 concept_count relative to index	0.015457	17.6389	24.7106	drug_era distinct concept count during day -180 through -1 concept_count relative to index	0.015457	23.3947	27.355
8	drug_era during day -1 through -1 days relative to index: acetaminophen	0.01206	0.195064	0.287422	drug_era during day -1 through -1 days relative to index: acetaminophen	0.01206	0.196535	0.270994
9	drug_era during day -1 through -1 days relative to index: albumin human, USP	0.0117803	0.00873708	0.0298937	drug_era during day -1 through -1 days relative to index: albumin human, USP	0.0117803	0.0360785	0.0511835
10	visit_occurrence concept count during day -365 through -1 concept_count relative to index: Outpatient Visit	0.01122	31.0929	49.73	visit_occurrence concept count during day -365 through -1 concept_count relative to index: Outpatient Visit	0.01122	16.5125	17.9391
11	drug_era distinct concept count during day -30 through -1 concept_count relative to index	0.0109125	11.2528	13.9801	drug_era distinct concept count during day -30 through -1 concept_count relative to index	0.0109125	16.1686	16.2111
12	condition_era during day -1 through -1 days relative to index: Fever	0.0108281	0.0121124	0.0419619	condition_era during day -1 through -1 days relative to index: Fever	0.0108281	0.0653233	0.108624
13	Charlson index - Romano adaptation	0.00740081	2.02556	2.47132	Charlson index - Romano adaptation	0.00740081	1.88263	2.04184
14	condition_era during day -1 through -1 days relative to index: Cataract	0.0069898	0.0223086	0.00586802	condition_era during day -1 through -1 days relative to index: Cataract	0.0069898	0.0118378	0.000829187
15	drug_era during day -1 through -1 days relative to index: glucose	0.00692868	0.215983	0.318866	drug_era during day -1 through -1 days relative to index: glucose	0.00692868	0.262342	0.249359
16	drug_era distinct concept count during day -365 through -1 concept_count relative to index	0.00669064	22.1732	31.133	drug_era distinct concept count during day -365 through -1 concept_count relative to index	0.00669064	29.1926	34.6119
17	visit_occurrence concept count during day -365 through -1 concept_count relative to index: Inpatient Visit	0.0053327	1.53952	2.21014	visit_occurrence concept count during day -365 through -1 concept_count relative to index: Inpatient Visit	0.0053327	2.2713	2.35512
18	drug_era during day -365 through -1 days relative to index: povidone-iodine	0.00438782	0.0259651	0.0691984	drug_era during day -365 through -1 days relative to index: povidone-iodine	0.00438782	0.0132368	0.0173376
19	PM10DaysCountcovSet	0.00379258	13.0075	12.8565	PM10DaysCountcovSet	0.00379258	123.652	158.327
20	visit_occurrence concept count during day -30 through -1 concept_count relative to index: Emergency Room Visit	0.00374442	0.335455	0.694198	visit_occurrence concept count during day -30 through -1 concept_count relative to index: Emergency Room Visit	0.00374442	0.559028	2.99992
	covariateName	covariateValue	CovariateMeanWithNoOutcome	CovariateMeanWithOutcome	covariateName	covariateValue	CovariateMeanWithNoOutcome	CovariateMeanWithOutcome
	PM10DaysCountcovSet	0.00379258	13.0075	12.8565	PM10DaysCountcovSet	0.00379258	123.652	158.327
	MaxTemperaturecovSet	0.00355065	0.967038	1.01196	MaxTemperaturecovSet	0.00355065	0.196212	0.270466
	RainCountcovSet	0.00324621	2.28504	2.30148
	MinTemperaturecovSet	0.00116836	0.53704	0.604739
	HumidCountcovSet	0.000473868	0.294951	0.311116
